# Supplementary material
Source: PubMed Central journal article supplement (PMC4519058)
Supplement: Supp_Table1.pdf [file Supp_Table1.pdf]

## Supplementary Data

SUPPLEMENTARY TABLE 1. CHARACTERISTICS OF MOTHERS AND THEIR INFANTS BY EXCLUSION STATUS

| <i>Maternal characteristics</i>                                                                          | <i>Excluded<sup>a,b</sup></i><br>n = 504 | <i>Included<sup>a</sup></i><br>n = 5,395 |
|----------------------------------------------------------------------------------------------------------|------------------------------------------|------------------------------------------|
| Maternal age (years), mean (SE)                                                                          | 29.0 (0.36)                              | 29.4 (0.11)                              |
| Maternal age (years) (%)                                                                                 |                                          |                                          |
| < 20                                                                                                     | 6.5                                      | 6.1                                      |
| 20–24                                                                                                    | 19.0                                     | 16.7                                     |
| 25–29                                                                                                    | 28.5                                     | 25.0                                     |
| 30–34                                                                                                    | 25.8                                     | 31.2                                     |
| ≥ 35                                                                                                     | 20.2                                     | 21.0                                     |
| Maternal education (%)                                                                                   |                                          |                                          |
| < High school diploma                                                                                    | 20.9 <sup>d</sup>                        | 9.6 <sup>d</sup>                         |
| High school diploma                                                                                      | 40.1 <sup>d</sup>                        | 25.8 <sup>d</sup>                        |
| Some college                                                                                             | 16.9                                     | 18.9 <sup>d</sup>                        |
| Completed college                                                                                        | 22.1 <sup>d</sup>                        | 45.7 <sup>d</sup>                        |
| Family income (%)                                                                                        |                                          |                                          |
| < \$15,000                                                                                               | 36.2 <sup>d</sup>                        | 20.8 <sup>d</sup>                        |
| \$15,000–\$24,999                                                                                        | 16.5 <sup>d</sup>                        | 8.9 <sup>d</sup>                         |
| \$25,000–49,999                                                                                          | 20.2 <sup>d</sup>                        | 16.6 <sup>d</sup>                        |
| ≥ \$50,000                                                                                               | 27.1 <sup>d</sup>                        | 53.7 <sup>d</sup>                        |
| Maternal race (%)                                                                                        |                                          |                                          |
| White non-Hispanic                                                                                       | 38.0 <sup>d</sup>                        | 69.2 <sup>d</sup>                        |
| Black non-Hispanic                                                                                       | 17.7 <sup>d</sup>                        | 8.1 <sup>d</sup>                         |
| Hispanic                                                                                                 | 29.9 <sup>d</sup>                        | 13.7 <sup>d</sup>                        |
| Asian                                                                                                    | 11.9 <sup>d</sup>                        | 7.8 <sup>d</sup>                         |
| Other                                                                                                    | 2.4 <sup>d</sup>                         | 1.2 <sup>d</sup>                         |
| Married (%), no                                                                                          | 44.7 <sup>d</sup>                        | 34.8 <sup>d</sup>                        |
| Smoking in pregnancy (%), any                                                                            | 4.6                                      | 7.1                                      |
| Pregnancy intention (%)                                                                                  |                                          |                                          |
| Then or sooner                                                                                           | 62.8                                     | 67.9                                     |
| Later                                                                                                    | 27.9                                     | 25.6                                     |
| Did not want pregnancy                                                                                   | 9.3                                      | 6.4                                      |
| Governmentt paid pregnancy/<br>delivery/WIC use <sup>c</sup> (%)                                         | 73.6 <sup>d</sup>                        | 45.1 <sup>d</sup>                        |
| Language, Spanish (%)                                                                                    | 25.2 <sup>d</sup>                        | 6.9 <sup>d</sup>                         |
| Household income < federal<br>poverty level (%)                                                          | 24.1                                     | 20.6                                     |
| Parity (%)                                                                                               |                                          |                                          |
| First born                                                                                               | 42.0                                     | 49.5                                     |
| Second born                                                                                              | 32.2                                     | 32.4                                     |
| Third or higher                                                                                          | 25.8                                     | 18.1                                     |
| Prepregnancy BMI (%)                                                                                     |                                          |                                          |
| Underweight (< 18.5)                                                                                     | 4.7                                      | 4.1                                      |
| Normal (18.5–24.9)                                                                                       | 54.0                                     | 56.6                                     |
| Overweight (25.0–29.9)                                                                                   | 24.1                                     | 22.0                                     |
| Obese (≥ 30.0)                                                                                           | 17.1                                     | 17.2                                     |
| No prenatal care in first trimester<br>(%)                                                               | 17.5 <sup>d</sup>                        | 10.7 <sup>d</sup>                        |
| Cesarean delivery (%)                                                                                    | 34.2                                     | 32.1                                     |
| Intimate partner violence (%),<br>Depression/anxiety visit before<br>pregnancy <sup>c</sup> (%)          | 1.7                                      | 1.2                                      |
| HCW talked with mother during<br>prenatal care for depression<br>during/after pregnancy <sup>c</sup> (%) | 15.6                                     | 14.5                                     |
|                                                                                                          | 82.9                                     | 77.9                                     |

SUPPLEMENTARY TABLE S1. (CONTINUED)

| <i>Maternal characteristics</i>       | <i>Excluded<sup>a,b</sup></i><br>n = 504 | <i>Included<sup>a</sup></i><br>n = 5,395 |
|---------------------------------------|------------------------------------------|------------------------------------------|
| <i>Infant characteristics</i>         |                                          |                                          |
| Infant had birth defect (%)           | 9.2 <sup>d</sup>                         | 6.0 <sup>d</sup>                         |
| Gestational age (%) < 37<br>weeks     | 7.4                                      | 6.8                                      |
| Birthweight < 2500g (%)               | 9.6                                      | 6.9                                      |
| NICU stay (%)                         | 13.1                                     | 12.1                                     |
| Infant length of stay<br>> 6 days (%) | 5.6                                      | 8.2                                      |
| Infant age at time of<br>PRAMS (days) | 123.8 (2.4)                              | 105.0 (0.8)                              |

<sup>a</sup>Population-based frequencies were weighted by race/ethnicity.

<sup>b</sup>Exclusions: Mothers missing postpartum depressive symptoms information (n = 178), or baby died before completing PRAMS (n = 30), or used HIH before PRAMS (n = 889).

<sup>c</sup>Differences in frequencies by exclusion status p < 0.05.

<sup>d</sup>Includes Medicaid, Commonwealth Care, Free-Care, or WIC use during prenatal care or delivery.

<sup>e</sup>Question in PRAMS 2009 survey, total n = 2,902; n = 2,631 included, n = 271 excluded.

BMI, body mass index; HCW, health care worker; NICU, neonatal intensive care unit; PRAMS, Pregnancy Risk Assessment Monitoring System; SE, standard error; WIC, Special Supplemental Nutrition Program for Women, Infants, and Children.

(continued)
