# Supplementary material
Source: PubMed Central journal article supplement (PMC4519058)
Supplement: Supp_Table2.pdf [file Supp_Table2.pdf]

SUPPLEMENTARY TABLE 2. FREQUENCY OF INDIVIDUAL POSTPARTUM DEPRESSIVE SYMPTOMS

| <i>Symptom</i>                    | <i>Always</i> | <i>Often</i> | <i>Sometimes</i> | <i>Rarely</i> | <i>Never</i> |
|-----------------------------------|---------------|--------------|------------------|---------------|--------------|
| Phase 5 (2007–2008)               |               |              |                  |               |              |
| Felt sad, depressed, hopeless (%) | 1.6           | 6.0          | 23.4             | 39.9          | 28.2         |
| Anhedonia (%)                     | 3.2           | 5.9          | 19.2             | 36.1          | 35.5         |
| Phase 6 (2009)                    |               |              |                  |               |              |
| Sad (%)                           | 1.3           | 7.9          | 28.8             | 31.0          | 31.0         |
| Hopelessness (%)                  | 0.9           | 2.9          | 10.2             | 16.8          | 69.2         |
| Slowed down (%)                   | 2.7           | 13.5         | 32.6             | 22.7          | 28.5         |

Population-based frequencies were weighted by race/ethnicity.
