# Supplementary material
Source: PubMed Central journal article supplement (PMC4519058)
Supplement: Supp_Table3.pdf [file Supp_Table3.pdf]

SUPPLEMENTARY TABLE 3. ASSOCIATION BETWEEN PERINATAL STRESSORS AND POSTPARTUM DEPRESSIVE SYMPTOMS, STRATIFIED BY MASSACHUSETTS-PRAMS PHASE

|                                | <i>Phase 5, 2007–2008</i> |                               |                                         | <i>Phase 6, 2009–2010</i> |                               |                                         |
|--------------------------------|---------------------------|-------------------------------|-----------------------------------------|---------------------------|-------------------------------|-----------------------------------------|
|                                | <i>N (%)<sup>a</sup></i>  | <i>% With PDS<sup>a</sup></i> | <i>Adjusted PR<sup>b</sup> (95% CI)</i> | <i>N (%)<sup>a</sup></i>  | <i>% With PDS<sup>a</sup></i> | <i>Adjusted PR<sup>b</sup> (95% CI)</i> |
| No stressor <sup>c</sup>       | 1,194 (43.2)              | 7.3                           | 1.00 (reference)                        | 1,016 (40.0)              | 6.5                           | 1.00 (reference)                        |
| Any stressor                   | 1,570 (56.8)              | 16.8                          | 1.37 (1.12–1.68)                        | 1,604 (60.0)              | 15.3                          | 2.37 (1.69–3.03)                        |
| Grouped stressors <sup>d</sup> |                           |                               |                                         |                           |                               |                                         |
| Partner                        | 835 (26.7)                | 23.9                          | 1.46 (1.09–1.95)                        | 761 (25.8)                | 22.2                          | 2.83 (1.94–4.12)                        |
| Trauma                         | 407 (15.4)                | 24.7                          | 1.08 (0.65–1.80)                        | 437 (17.3)                | 18.8                          | 1.27 (0.72–2.25)                        |
| Financial                      | 815 (27.0)                | 23.1                          | 1.10 (0.80–1.53)                        | 880 (31.2)                | 18.1                          | 1.58 (1.04–2.39)                        |
| Emotional                      | 697 (28.4)                | 13.5                          | 0.85 (0.60–1.21)                        | 746 (31.2)                | 14.3                          | 1.48 (0.99–2.21)                        |
| 1–3 Stressors                  | 1,271 (46.7)              | 13.4                          | 1.28 (1.03–1.58)                        | 1,303 (48.7)              | 12.8                          | 2.16 (1.60–2.91)                        |
| 4–6 Stressors                  | 247 (8.3)                 | 30.7                          | 1.77 (1.32–2.36)                        | 268 (10.3)                | 24.2                          | 3.79 (2.63–5.48)                        |
| ≥7 Stressors                   | 52 (1.7)                  | 43.1                          | 2.67 (1.82–3.91)                        | 33 (1.0)                  | 43.8                          | 6.03 (3.51–10.33)                       |

<sup>a</sup>Population-based frequencies were weighted by race/ethnicity.

<sup>b</sup>Adjusted for other stressors, maternal age, education, family income, pregnancy intention, government paid care/ WIC use, smoking, marital status, intimate partner violence, prenatal care and calendar year.

<sup>c</sup>Reference group for all analyses.

<sup>d</sup>Subjects may have stressors in more than one group; therefore may total more than 100.

CI, confidence interval; PDS, postpartum depressive symptoms; PR, prevalence ratios.
