# Supplementary material
Source: PubMed Central journal article supplement (PMC4519058)
Supplement: Supp_Table4.pdf [file Supp_Table4.pdf]

SUPPLEMENTARY TABLE 4. ASSOCIATION BETWEEN PERINATAL STRESSORS, PDS AND HELP-SEEKING BEHAVIORS, STRATIFIED BY PRIOR MENTAL HEALTH VISIT STATUS AMONG MA\_PRAMS PHASE 6 MOTHERS

|                                | No prior report of mental health visit |                          |                                   |                            | With prior report of mental health visit |                    |                          |                                   |                            |                        |
|--------------------------------|----------------------------------------|--------------------------|-----------------------------------|----------------------------|------------------------------------------|--------------------|--------------------------|-----------------------------------|----------------------------|------------------------|
|                                | n (%) <sup>a</sup>                     | % With PDS <sup>aa</sup> | Adjusted PR <sup>b</sup> (95% CI) | % Sought help <sup>c</sup> | Unadjusted PR (95% CI)                   | n (%) <sup>a</sup> | % With PDS <sup>aa</sup> | Adjusted PR <sup>b</sup> (95% CI) | % Sought help <sup>c</sup> | Unadjusted PR (95% CI) |
| No stressor <sup>d</sup>       | 913 (42.1%)                            | 5.4                      | 1.00 (reference)                  | 31.1                       | 1.00 (reference)                         | 95 (26.8%)         | 15.5                     | 1.00 (reference)                  | 54.6                       | 1.00 (reference)       |
| Any stressor                   | 1,333 (57.9%)                          | 12.7                     | 2.19 (1.57–3.05)                  | 31.7                       | 1.10 (0.65–1.85)                         | 264 (73.2%)        | 27.7                     | 2.54 (1.37–4.71)                  | 81.5                       | 1.03 (0.72–1.46)       |
| Grouped stressors <sup>e</sup> |                                        |                          |                                   |                            |                                          |                    |                          |                                   |                            |                        |
| Partner                        | 610 (23.8%)                            | 17.8                     | 2.54 (1.63–3.96)                  | 25.4                       | 0.98 (0.56–1.71)                         | 148 (37.6%)        | 38.9                     | 3.42 (1.68–6.98)                  | 78.7                       | 1.00 (0.70–1.45)       |
| Trauma                         | 326 (15.4%)                            | 13.9                     | 1.06 (0.51–2.18)                  | 33.6                       | 1.24 (0.68–2.26)                         | 108 (28.2%)        | 35.1                     | 2.06 (0.79–5.39)                  | 74.8                       | 0.99 (0.67–1.45)       |
| Financial                      | 726 (29.7%)                            | 15.6                     | 1.78 (1.10–2.88)                  | 38.1                       | 1.21 (0.70–2.07)                         | 153 (40.8%)        | 29.2                     | 0.97 (0.39–2.47)                  | 88.4                       | 1.07 (0.74–1.55)       |
| Emotional                      | 625 (30.3%)                            | 11.6                     | 1.35 (0.85–2.15)                  | 39.5                       | 1.45 (0.84–2.49)                         | 118 (36.7%)        | 27.6                     | 1.97 (0.85–4.85)                  | 88.8                       | 1.05 (0.72–1.53)       |
| 1–3 Stressors                  | 1,106 (47.7%)                          | 11.0                     | 2.03 (1.44–2.86)                  | 33.5                       | 1.03 (0.60–1.78)                         | 188 (54.8%)        | 22.2                     | 2.25 (1.20–4.23)                  | 83.4                       | 1.06 (0.73–1.53)       |
| 4–6 Stressors                  | 206 (9.6%)                             | 20.0                     | 3.36 (2.17–5.22)                  | 24.1                       | 1.06 (0.55–2.05)                         | 64 (15.5%)         | 39.7                     | 3.95 (2.00–7.81)                  | 74.4                       | 0.95 (0.63–1.43)       |
| ≥7 Stressors                   | 21 (0.7%)                              | 25.2                     | 5.85 (2.78–12.31)                 | 61.8                       | 2.40 (1.18–4.90)                         | 12 (2.8%)          | 70.1                     | 4.02 (1.75–9.25)                  | 91.8                       | 1.17 (0.74–1.99)       |

<sup>a</sup>Population-based frequencies were weighted by race/ethnicity.

<sup>b</sup>Adjusted for other stressors, maternal age, education, family income, pregnancy intention, government paid care/WIC use, smoking, marital status, intimate partner violence, prenatal care, and calendar year.

<sup>c</sup>Among mothers with PDS.

<sup>d</sup>Reference group for all analyses.

<sup>e</sup>Subjects may have stressors in more than one group; therefore % may total more than 100.
